# Supplementary material for: Dissection of transcriptome dysregulation and immune characterization in women with germline BRCA1 mutation at single-cell resolution
Source: BMC Med. 2022 Sep 9;20:283. doi: 10.1186/s12916-022-02489-9 (PMC9461201; doi:10.1186/s12916-022-02489-9)
Supplement: Supplementary file 4 — Additional file 4: Table S2. Top 100 marker genes of fibroblast, T cell, monocytes and blood vessel endothelium. [file 12916_2022_2489_MOESM4_ESM.xlsx]

## Sheet: Epithelial cell_MarkerGenes
Gene	p_val	avg_log2FC	pct.1	pct.2	p_val_adj
CRISP3	0	2.98037	0.789	0.125	0
OVGP1	0	2.93042	0.53	0.042	0
WFDC2	0	2.61159	0.973	0.287	0
SCGB1D4	2.95306e-258	2.37514	0.308	0.084	9.90396e-254
CLDN4	0	2.3478	0.941	0.168	0
SCGB1D2	0	2.14765	0.536	0.057	0
SLPI	0	2.11909	0.963	0.318	0
KRT18	0	2.08798	0.968	0.296	0
CLU	0	2.08201	0.965	0.531	0
SCGB2A1	0	1.96495	0.879	0.147	0
MMP7	0	1.95708	0.583	0.065	0
CLDN3	0	1.94466	0.939	0.16	0
TACSTD2	0	1.93698	0.808	0.118	0
MSLN	0	1.85426	0.694	0.072	0
ELF3	0	1.8328	0.961	0.206	0
KRT8	0	1.82483	0.954	0.234	0
CAPS	0	1.79009	0.786	0.265	0
AGR2	0	1.70327	0.835	0.24	0
SPINT2	0	1.66524	0.939	0.188	0
C20orf85	0	1.64866	0.663	0.209	0
TPPP3	0	1.60303	0.66	0.241	0
KRT19	0	1.57881	0.935	0.282	0
C9orf24	0	1.5735	0.634	0.165	0
KRT7	0	1.55751	0.689	0.075	0
CD24	0	1.54915	0.934	0.167	0
RHEX	0	1.54908	0.41	0.022	0
CXCL1	0	1.52579	0.377	0.093	0
FAM183A	0	1.49675	0.617	0.132	0
AGR3	0	1.4907	0.783	0.127	0
C1orf194	0	1.48879	0.639	0.15	0
LCN2	0	1.48206	0.726	0.09	0
MUC1	0	1.48068	0.859	0.074	0
FOLR1	0	1.48023	0.882	0.097	0
BCAM	0	1.47711	0.852	0.247	0
LAMC2	0	1.44781	0.827	0.077	0
C19orf33	0	1.44665	0.783	0.068	0
TFF3	0	1.44367	0.633	0.253	0
EPCAM	0	1.44163	0.907	0.097	0
CLDN7	0	1.43286	0.891	0.087	0
CCL2	6.679e-298	1.38883	0.601	0.273	2.24e-293
C5orf49	0	1.38352	0.678	0.12	0
RNASE1	0	1.37955	0.645	0.081	0
TMEM190	0	1.3474	0.616	0.167	0
RSPH1	0	1.34058	0.677	0.132	0
BIRC3	0	1.33292	0.819	0.226	0
C9orf116	0	1.31864	0.674	0.087	0
PAX8	0	1.31132	0.735	0.041	0
ERP27	0	1.30832	0.807	0.068	0
PSENEN	0	1.29964	0.82	0.33	0
CLDN1	0	1.2803	0.672	0.09	0
SNTN	0	1.25135	0.599	0.125	0
AL357093.2	0	1.24852	0.558	0.07	0
TNFAIP2	0	1.23165	0.644	0.193	0
ASRGL1	0	1.23006	0.84	0.091	0
ODF3B	0	1.22527	0.767	0.208	0
FBXO21	0	1.22291	0.89	0.259	0
KLF5	0	1.21729	0.891	0.145	0
TXN	0	1.21426	0.907	0.646	0
CXCL2	1.29913e-188	1.20717	0.656	0.405	4.35703e-184
DYNLRB2	0	1.20601	0.6	0.07	0
FOXJ1	0	1.2028	0.655	0.104	0
PRDX5	0	1.19931	0.922	0.65	0
MORN2	0	1.18188	0.713	0.153	0
SMIM22	0	1.17243	0.79	0.073	0
SERPINA3	0	1.16733	0.355	0.031	0
PIFO	0	1.15796	0.65	0.12	0
ITPKC	0	1.15644	0.694	0.094	0
MT-ND4	0	1.15389	0.987	0.921	0
GSTP1	0	1.15257	0.964	0.766	0
PDK4	0	1.14682	0.796	0.349	0
PLPP2	0	1.13748	0.803	0.07	0
LYPD1	0	1.13475	0.543	0.036	0
C11orf88	0	1.12995	0.562	0.092	0
AC007906.2	0	1.12976	0.778	0.08	0
SLC40A1	0	1.1282	0.872	0.324	0
HMGN3	0	1.12379	0.914	0.508	0
CFAP157	0	1.12312	0.642	0.095	0
UGT2B7	0	1.11761	0.656	0.031	0
TSTD1	0	1.11267	0.858	0.234	0
DDR1	0	1.11091	0.839	0.071	0
TSPAN3	0	1.10276	0.907	0.391	0
TSPAN1	0	1.09992	0.653	0.079	0
MUC16	0	1.09643	0.706	0.066	0
SOX17	0	1.09578	0.764	0.078	0
ZMYND10	0	1.08992	0.567	0.082	0
CETN2	0	1.08914	0.745	0.199	0
SLC34A2	0	1.07587	0.637	0.034	0
AK1	0	1.0722	0.616	0.204	0
ASS1	0	1.05342	0.636	0.236	0
SLC44A4	0	1.04844	0.709	0.084	0
PERP	0	1.04666	0.892	0.296	0
PTPRF	0	1.03831	0.78	0.078	0
PKP2	0	1.0365	0.863	0.142	0
FAM107A	0	1.03581	0.61	0.092	0
CCDC146	0	1.03151	0.7	0.11	0
CKB	0	1.02872	0.89	0.389	0
CCDC170	0	1.02493	0.716	0.151	0
FXYD3	0	1.01864	0.748	0.067	0
GAS6	0	1.01617	0.916	0.376	0
DMKN	0	1.01292	0.86	0.211	0

## Sheet: ALl marker genes list
Table S3. Top 100 marker genes of fibroblast, T cell, monocytes and blood vessel endothelium
Gene	p_val	avg_log2FC	pct.1	pct.2	p_val_adj	Tissue
DCN	0	4.99224	0.958	0.097	0	Fibroblast
IGFBP5	0	4.24503	0.967	0.276	0	Fibroblast
SFRP4	0	3.92802	0.879	0.052	0	Fibroblast
FBLN1	0	3.74995	0.897	0.057	0	Fibroblast
IGFBP6	0	3.69344	0.88	0.092	0	Fibroblast
ACTA2	0	3.6507	0.835	0.18	0	Fibroblast
IGF2.1	0	3.47756	0.788	0.09	0	Fibroblast
TAGLN	0	3.4458	0.838	0.155	0	Fibroblast
SERPINF1	0	3.34423	0.916	0.103	0	Fibroblast
MGP	0	3.08057	0.878	0.16	0	Fibroblast
CRISPLD2	0	3.04646	0.91	0.057	0	Fibroblast
MFAP4	0	2.98085	0.897	0.055	0	Fibroblast
ADAMTS1	0	2.96157	0.918	0.186	0	Fibroblast
LUM	0	2.94994	0.715	0.029	0	Fibroblast
MEG3	0	2.94012	0.761	0.042	0	Fibroblast
TPM2	0	2.90705	0.879	0.1	0	Fibroblast
SPARCL1	0	2.79015	0.972	0.204	0	Fibroblast
HSPB6	0	2.76299	0.856	0.051	0	Fibroblast
ADH1B	0	2.73668	0.523	0.026	0	Fibroblast
F3	0	2.68886	0.782	0.097	0	Fibroblast
MYL9	0	2.6725	0.892	0.225	0	Fibroblast
GEM	0	2.66725	0.689	0.075	0	Fibroblast
PTGDS	0	2.62018	0.742	0.048	0	Fibroblast
RARRES2	0	2.50729	0.946	0.258	0	Fibroblast
RAMP1	0	2.49273	0.824	0.107	0	Fibroblast
EGR1	0	2.47129	0.978	0.616	0	Fibroblast
NBL1	0	2.44242	0.894	0.224	0	Fibroblast
C1S	0	2.43445	0.832	0.087	0	Fibroblast
LGALS1	0	2.42061	0.962	0.415	0	Fibroblast
CALD1	0	2.38304	0.953	0.257	0	Fibroblast
IGFBP3	0	2.366	0.69	0.076	0	Fibroblast
RASD1	0	2.35842	0.684	0.181	0	Fibroblast
C11orf96	0	2.33181	0.62	0.061	0	Fibroblast
ISLR	0	2.32784	0.816	0.043	0	Fibroblast
MYC	0	2.32582	0.766	0.274	0	Fibroblast
FOS	0	2.30534	0.993	0.812	0	Fibroblast
CCDC80	0	2.26008	0.671	0.146	0	Fibroblast
SPARC	0	2.2558	0.854	0.066	0	Fibroblast
SFRP1	0	2.25354	0.755	0.061	0	Fibroblast
TGM2	0	2.25041	0.802	0.193	0	Fibroblast
IGFBP4	0	2.21897	0.954	0.363	0	Fibroblast
APOD	0	2.21777	0.606	0.098	0	Fibroblast
DPT	0	2.18194	0.571	0.021	0	Fibroblast
JUNB	0	2.17421	0.99	0.856	0	Fibroblast
MYH11	0	2.15638	0.282	0.034	0	Fibroblast
LTBP4	0	2.15381	0.862	0.23	0	Fibroblast
CNN1	0	2.13091	0.589	0.046	0	Fibroblast
JUN	0	2.12106	0.98	0.716	0	Fibroblast
MXRA8	0	2.11067	0.796	0.034	0	Fibroblast
COL6A2	0	2.09425	0.867	0.141	0	Fibroblast
CSRP1	0	2.07399	0.899	0.37	0	Fibroblast
CYR61	0	2.04904	0.878	0.377	0	Fibroblast
COL6A1	0	2.04785	0.88	0.225	0	Fibroblast
COL6A3	0	2.04308	0.723	0.034	0	Fibroblast
FOSB	0	2.02392	0.958	0.649	0	Fibroblast
PLPP3	0	1.99868	0.811	0.154	0	Fibroblast
C7	0	1.9977	0.345	0.016	0	Fibroblast
MMP19	0	1.98166	0.6	0.043	0	Fibroblast
COL1A2	0	1.95934	0.724	0.063	0	Fibroblast
ADAMTS4	0	1.9417	0.516	0.054	0	Fibroblast
SELENOM	0	1.93994	0.886	0.249	0	Fibroblast
MFGE8	0	1.89228	0.795	0.164	0	Fibroblast
SOD3	0	1.88986	0.875	0.23	0	Fibroblast
NR4A1	0	1.88554	0.964	0.59	0	Fibroblast
FXYD1	0	1.8843	0.817	0.149	0	Fibroblast
ID3	0	1.87366	0.799	0.291	0	Fibroblast
LRP1	0	1.82709	0.753	0.126	0	Fibroblast
PODN	0	1.82367	0.677	0.043	0	Fibroblast
ZFP36	0	1.81838	0.985	0.857	0	Fibroblast
MDK	0	1.8145	0.858	0.319	0	Fibroblast
LAMA2	0	1.81324	0.688	0.099	0	Fibroblast
GSN	0	1.80941	0.873	0.433	0	Fibroblast
CTSK	0	1.79595	0.674	0.04	0	Fibroblast
OLFML3	0	1.79423	0.735	0.052	0	Fibroblast
TFPI2	0	1.77965	0.682	0.2	0	Fibroblast
MYLK	0	1.76643	0.635	0.169	0	Fibroblast
BST2	0	1.76642	0.936	0.379	0	Fibroblast
POSTN	0	1.76551	0.48	0.04	0	Fibroblast
OGN	0	1.74211	0.629	0.025	0	Fibroblast
ZNF331	0	1.72794	0.817	0.42	0	Fibroblast
PDGFRA	0	1.71986	0.64	0.025	0	Fibroblast
FHL1	0	1.70984	0.776	0.185	0	Fibroblast
SMOC2	0	1.70353	0.658	0.026	0	Fibroblast
SERPING1	0	1.70342	0.906	0.383	0	Fibroblast
TPM1	0	1.66597	0.846	0.352	0	Fibroblast
RARRES1	0	1.66278	0.609	0.162	0	Fibroblast
AEBP1	0	1.64281	0.653	0.052	0	Fibroblast
BTG2	0	1.63832	0.966	0.71	0	Fibroblast
GPNMB	0	1.63328	0.575	0.034	0	Fibroblast
COL1A1	0	1.62912	0.643	0.06	0	Fibroblast
KLF4	0	1.61722	0.914	0.428	0	Fibroblast
TIMP3	0	1.5821	0.928	0.2	0	Fibroblast
KLF9	0	1.57688	0.818	0.292	0	Fibroblast
LAPTM4A	0	1.56667	0.956	0.565	0	Fibroblast
CD248	0	1.55788	0.581	0.024	0	Fibroblast
EFHD1	0	1.54802	0.646	0.027	0	Fibroblast
ALDH1A1	0	1.54414	0.784	0.266	0	Fibroblast
NFKBIZ	0	1.53196	0.889	0.534	0	Fibroblast
SOCS3	0	1.52047	0.86	0.438	0	Fibroblast
OSR2	0	1.49425	0.558	0.025	0	Fibroblast
CCL5	0	4.69467	0.814	0.03	0	T Cell
GNLY	0	4.35094	0.263	0.008	0	T Cell
CCL4	0	4.18301	0.679	0.06	0	T Cell
CXCR4	0	4.04023	0.968	0.101	0	T Cell
NKG7	0	3.99861	0.695	0.018	0	T Cell
CD7	0	3.91137	0.85	0.03	0	T Cell
CD3E	0	3.70852	0.94	0.013	0	T Cell
IL7R	0	3.61233	0.516	0.017	0	T Cell
IL32	0	3.608	0.875	0.175	0	T Cell
CD52	0	3.36336	0.891	0.047	0	T Cell
CST7	0	3.33709	0.815	0.028	0	T Cell
PTPRCAP	0	3.13026	0.908	0.019	0	T Cell
CD8A	0	3.09608	0.491	0.008	0	T Cell
ARHGDIB	0	3.08247	0.979	0.234	0	T Cell
CD69	0	3.03643	0.751	0.032	0	T Cell
GZMA	0	3.01795	0.627	0.007	0	T Cell
PTPRC	0	3.00688	0.952	0.078	0	T Cell
HCST	0	2.87464	0.896	0.075	0	T Cell
CTSW	0	2.81056	0.699	0.011	0	T Cell
CD3D	0	2.75085	0.721	0.008	0	T Cell
SRGN	0	2.64604	0.991	0.213	0	T Cell
RAC2	0	2.61482	0.868	0.077	0	T Cell
TSC22D3	0	2.57172	0.965	0.546	0	T Cell
PRF1	0	2.55844	0.583	0.006	0	T Cell
GZMH	0	2.5317	0.521	0.006	0	T Cell
KLRB1	0	2.52866	0.502	0.007	0	T Cell
TUBA4A	0	2.49901	0.702	0.131	0	T Cell
BTG1	0	2.4526	0.996	0.764	0	T Cell
CORO1A	0	2.43804	0.86	0.083	0	T Cell
CD2	0	2.42603	0.684	0.009	0	T Cell
GZMB	0	2.41969	0.366	0.006	0	T Cell
GZMK	0	2.39735	0.298	0.003	0	T Cell
LCP1	0	2.32083	0.821	0.079	0	T Cell
XCL1	0	2.31461	0.355	0.004	0	T Cell
HLA-B	0	2.3108	0.997	0.766	0	T Cell
CCL4L2	0	2.30535	0.272	0.041	0	T Cell
CREM	0	2.29487	0.767	0.381	0	T Cell
ZFP36L2	0	2.28895	0.995	0.765	0	T Cell
DUSP2	0	2.28082	0.808	0.262	0	T Cell
LEPROTL1	0	2.2699	0.826	0.239	0	T Cell
SYTL3	0	2.2437	0.763	0.127	0	T Cell
CYTIP	0	2.21695	0.781	0.058	0	T Cell
EVL	0	2.18297	0.762	0.134	0	T Cell
SPOCK2	0	2.18123	0.683	0.052	0	T Cell
CD96	0	2.16522	0.689	0.017	0	T Cell
HOPX	0	2.16343	0.591	0.062	0	T Cell
SH3BGRL3	0	2.1422	0.966	0.547	0	T Cell
GZMM	0	2.14184	0.671	0.011	0	T Cell
TRBC2	0	2.13398	0.644	0.023	0	T Cell
CD247	0	2.05537	0.616	0.007	0	T Cell
KLRD1	0	2.05055	0.42	0.006	0	T Cell
LSP1	0	2.03259	0.882	0.232	0	T Cell
FYN	0	2.02903	0.765	0.21	0	T Cell
LTB	0	2.02689	0.425	0.022	0	T Cell
CD8B	0	1.98601	0.388	0.005	0	T Cell
TRBC1	0	1.97385	0.509	0.006	0	T Cell
GNG2	0	1.95618	0.659	0.052	0	T Cell
B2M	0	1.95346	1	0.919	0	T Cell
RNF125	0	1.94093	0.639	0.059	0	T Cell
SH2D2A	0	1.92879	0.607	0.011	0	T Cell
CD37	0	1.91481	0.837	0.082	0	T Cell
RGS1	0	1.90821	0.606	0.061	0	T Cell
STK17B	0	1.90728	0.754	0.118	0	T Cell
HLA-A	0	1.90397	0.995	0.798	0	T Cell
CRYBG1	0	1.88445	0.656	0.115	0	T Cell
CD53	0	1.87911	0.74	0.067	0	T Cell
S100A4	0	1.87041	0.937	0.494	0	T Cell
DDIT4	0	1.86867	0.877	0.52	0	T Cell
PARP8	0	1.86631	0.67	0.12	0	T Cell
ALOX5AP	0	1.8659	0.734	0.066	0	T Cell
ETS1	0	1.84525	0.679	0.114	0	T Cell
HLA-C	0	1.84483	0.993	0.783	0	T Cell
CD3G	0	1.83763	0.533	0.006	0	T Cell
FYB1	0	1.82782	0.678	0.071	0	T Cell
CLIC3	0	1.81521	0.324	0.053	0	T Cell
RUNX3	0	1.77548	0.567	0.03	0	T Cell
XCL2	0	1.76621	0.296	0.004	0	T Cell
PTGER4	0	1.75899	0.638	0.114	0	T Cell
ARHGAP9	0	1.75472	0.573	0.032	0	T Cell
LCK	0	1.74579	0.59	0.007	0	T Cell
ADGRE5	0	1.69028	0.681	0.209	0	T Cell
PTPN22	0	1.67871	0.54	0.019	0	T Cell
FAM177A1	0	1.67483	0.707	0.384	0	T Cell
SARAF	0	1.66637	0.979	0.772	0	T Cell
CD48	0	1.65959	0.6	0.052	0	T Cell
GPR65	0	1.65931	0.561	0.042	0	T Cell
WIPF1	0	1.65857	0.653	0.116	0	T Cell
SLA	0	1.6469	0.559	0.055	0	T Cell
DUSP4	0	1.64638	0.401	0.098	0	T Cell
STK4	0	1.63302	0.669	0.183	0	T Cell
ID2	0	1.62779	0.746	0.388	0	T Cell
IKZF1	0	1.62267	0.55	0.034	0	T Cell
RPS29	0	1.62137	0.963	0.742	0	T Cell
ITGB2	0	1.62098	0.627	0.08	0	T Cell
IL2RG	0	1.62045	0.554	0.02	0	T Cell
TAGAP	0	1.6142	0.472	0.054	0	T Cell
CXCR6	0	1.61125	0.401	0.005	0	T Cell
EMB	0	1.6075	0.579	0.071	0	T Cell
ACAP1	0	1.6074	0.566	0.048	0	T Cell
SEPT1	0	1.60533	0.584	0.097	0	T Cell
C1QC	0	4.66344	0.524	0.015	0	Monocyte
S100A8	0	4.61804	0.334	0.008	0	Monocyte
LYZ	0	4.52764	0.667	0.018	0	Monocyte
HLA-DPB1	0	4.37834	0.875	0.303	0	Monocyte
HLA-DRA	0	4.35797	0.94	0.348	0	Monocyte
C1QB	0	4.354	0.511	0.013	0	Monocyte
S100A9	0	4.33946	0.375	0.015	0	Monocyte
HLA-DPA1	0	4.33398	0.873	0.284	0	Monocyte
IL1B	0	4.32628	0.637	0.074	0	Monocyte
APOE	0	4.13276	0.398	0.064	0	Monocyte
C1QA	0	3.99612	0.502	0.013	0	Monocyte
FCER1G	0	3.97139	0.858	0.05	0	Monocyte
CD74	0	3.90099	0.985	0.698	0	Monocyte
TYROBP	0	3.87298	0.864	0.077	0	Monocyte
HLA-DRB1	0	3.8126	0.892	0.357	0	Monocyte
AIF1	0	3.54808	0.821	0.02	0	Monocyte
HLA-DQA1	0	3.54245	0.697	0.135	0	Monocyte
CCL3	0	3.47306	0.395	0.032	0	Monocyte
APOC1	0	3.40352	0.388	0.042	0	Monocyte
HLA-DQB1	0	3.21412	0.706	0.192	0	Monocyte
FCGBP	0	3.12408	0.326	0.02	0	Monocyte
HLA-DRB5	0	3.09166	0.661	0.143	0	Monocyte
CD14	0	3.04613	0.662	0.068	0	Monocyte
MS4A6A	0	3.00602	0.719	0.005	0	Monocyte
PLAUR	0	2.92973	0.757	0.302	0	Monocyte
MS4A7	0	2.86255	0.655	0.011	0	Monocyte
CCL3L1	0	2.74451	0.303	0.014	0	Monocyte
GPR183	0	2.74234	0.649	0.065	0	Monocyte
FTL	0	2.70127	0.974	0.87	0	Monocyte
CD68	0	2.6627	0.724	0.095	0	Monocyte
FCN1	0	2.61477	0.304	0.004	0	Monocyte
COTL1	0	2.60135	0.776	0.28	0	Monocyte
C5AR1	0	2.58639	0.609	0.087	0	Monocyte
HLA-DMA	0	2.58532	0.723	0.201	0	Monocyte
CXCL8	5.7012e-229	2.56657	0.477	0.155	1.91207e-224	Monocyte
BCL2A1	0	2.54485	0.585	0.034	0	Monocyte
G0S2	1.17115e-134	2.52056	0.436	0.197	3.9278e-130	Monocyte
LAPTM5	0	2.52004	0.853	0.26	0	Monocyte
SPI1	0	2.51313	0.717	0.015	0	Monocyte
NLRP3	0	2.43096	0.597	0.024	0	Monocyte
C1orf162	0	2.42339	0.707	0.066	0	Monocyte
CYBB	0	2.40611	0.661	0.01	0	Monocyte
CST3	0	2.38396	0.901	0.687	0	Monocyte
CTSS	0	2.38348	0.737	0.23	0	Monocyte
NPC2	0	2.38013	0.823	0.585	0	Monocyte
SERPINA1	0	2.34711	0.625	0.042	0	Monocyte
FGL2	0	2.34178	0.662	0.078	0	Monocyte
SRGN	0	2.32164	0.896	0.313	0	Monocyte
LST1	0	2.2351	0.684	0.023	0	Monocyte
TREM2	0	2.23208	0.319	0.005	0	Monocyte
GRN	0	2.18726	0.734	0.309	0	Monocyte
CD163	0	2.15586	0.553	0.004	0	Monocyte
AREG	2.97401e-104	2.10714	0.474	0.251	9.97422e-100	Monocyte
CTSB	4.31541e-269	2.09618	0.752	0.482	1.4473e-264	Monocyte
EREG	0	2.09451	0.261	0.005	0	Monocyte
PSAP	0	2.09017	0.844	0.721	0	Monocyte
CSF1R	0	2.08666	0.552	0.006	0	Monocyte
HLA-DMB	0	2.08306	0.606	0.085	0	Monocyte
PLEK	0	2.05658	0.579	0.025	0	Monocyte
ALOX5AP	3.35459e-299	2.04832	0.556	0.159	1.12506e-294	Monocyte
SLC11A1	0	2.04177	0.511	0.029	0	Monocyte
CCL4L2	3.18351e-280	2.03422	0.345	0.063	1.06769e-275	Monocyte
RGS1	1.54455e-298	2.02012	0.501	0.134	5.1801e-294	Monocyte
CD83	4.7917e-255	2.01002	0.555	0.199	1.60704e-250	Monocyte
VCAN	4.429e-298	1.98781	0.284	0.042	1.4854e-293	Monocyte
SGK1	8.88352e-163	1.92093	0.597	0.317	2.97936e-158	Monocyte
FCGR2A	0	1.9176	0.578	0.035	0	Monocyte
INSIG1	2.73536e-178	1.90418	0.529	0.236	9.17385e-174	Monocyte
ARPC1B	0	1.89148	0.779	0.455	0	Monocyte
CLEC7A	0	1.88976	0.591	0.006	0	Monocyte
RILPL2	0	1.87876	0.679	0.265	0	Monocyte
ITGB2	0	1.87387	0.729	0.138	0	Monocyte
CAPG	4.54792e-267	1.87318	0.615	0.236	1.52528e-262	Monocyte
CXCL16	0	1.87259	0.637	0.177	0	Monocyte
FTH1	0	1.85494	0.977	0.967	0	Monocyte
RNASE6	0	1.82963	0.541	0.005	0	Monocyte
IGSF6	0	1.76625	0.53	0.005	0	Monocyte
SAMSN1	0	1.76211	0.666	0.138	0	Monocyte
FPR1	0	1.75016	0.529	0.005	0	Monocyte
THBS1	1.41599e-27	1.74915	0.379	0.295	4.74893e-23	Monocyte
CALHM6	0	1.74812	0.564	0.039	0	Monocyte
RGS2	3.6988e-305	1.7379	0.665	0.246	1.2405e-300	Monocyte
ACSL1	0	1.73248	0.586	0.07	0	Monocyte
HERPUD1	7.50158e-137	1.73004	0.741	0.625	2.51588e-132	Monocyte
PPIF	0	1.72995	0.537	0.141	0	Monocyte
OLR1	0	1.72349	0.398	0.005	0	Monocyte
TBXAS1	0	1.69406	0.574	0.028	0	Monocyte
HCLS1	0	1.67512	0.702	0.177	0	Monocyte
CYBA	1.82948e-276	1.6381	0.818	0.642	6.1357e-272	Monocyte
DBI	7.71301e-135	1.63489	0.686	0.495	2.58679e-130	Monocyte
RNASET2	4.05457e-222	1.6275	0.71	0.407	1.35982e-217	Monocyte
PLD4	0	1.61843	0.397	0.006	0	Monocyte
ARPC3	2.13015e-259	1.61762	0.814	0.627	7.14408e-255	Monocyte
HMOX1	0	1.61614	0.411	0.032	0	Monocyte
RAB31	0	1.61612	0.677	0.256	0	Monocyte
SAT1	1.99431e-278	1.61328	0.89	0.822	6.6885e-274	Monocyte
CPVL	0	1.60626	0.58	0.105	0	Monocyte
RGS10	2.75681e-249	1.58879	0.641	0.282	9.24579e-245	Monocyte
CSTA	0	1.58064	0.462	0.005	0	Monocyte
LILRB4	0	1.57503	0.451	0.004	0	Monocyte
CCL21	0	7.06686	0.744	0.055	0	Blood vessel endothelium
CAVIN2	0	4.91942	0.979	0.169	0	Blood vessel endothelium
CLDN5	0	4.47559	0.872	0.021	0	Blood vessel endothelium
MMRN1	0	4.29827	0.768	0.008	0	Blood vessel endothelium
LYVE1	0	3.48638	0.641	0.013	0	Blood vessel endothelium
TFPI	0	3.10706	0.817	0.234	0	Blood vessel endothelium
CCL14	0	3.09106	0.586	0.008	0	Blood vessel endothelium
PPFIBP1	0	3.03789	0.875	0.249	0	Blood vessel endothelium
GNG11	0	3.02086	0.935	0.333	0	Blood vessel endothelium
RAMP2	0	2.95998	0.861	0.073	0	Blood vessel endothelium
PRSS23	0	2.84173	0.787	0.086	0	Blood vessel endothelium
TM4SF1	0	2.68108	0.931	0.317	0	Blood vessel endothelium
CAV1	0	2.61159	0.903	0.284	0	Blood vessel endothelium
ECSCR	0	2.59048	0.799	0.005	0	Blood vessel endothelium
FABP5	0	2.52125	0.593	0.113	0	Blood vessel endothelium
NNMT	0	2.48541	0.805	0.122	0	Blood vessel endothelium
APOLD1	0	2.42134	0.763	0.03	0	Blood vessel endothelium
NRP2	0	2.41371	0.699	0.12	0	Blood vessel endothelium
EGFL7	0	2.28758	0.75	0.013	0	Blood vessel endothelium
PECAM1	0	2.25777	0.789	0.051	0	Blood vessel endothelium
PROX1	0	2.20371	0.626	0.029	0	Blood vessel endothelium
EMCN	0	2.14082	0.769	0.007	0	Blood vessel endothelium
EMP1	0	2.13302	0.904	0.368	0	Blood vessel endothelium
MT2A	7.17746e-225	2.12533	0.836	0.549	2.40718e-220	Blood vessel endothelium
FXYD6	0	2.09758	0.734	0.112	0	Blood vessel endothelium
THBD	0	2.08922	0.652	0.055	0	Blood vessel endothelium
RELN	0	2.08105	0.545	0.006	0	Blood vessel endothelium
ANGPT2	0	2.03568	0.543	0.008	0	Blood vessel endothelium
A2M	0	2.03227	0.767	0.111	0	Blood vessel endothelium
DKK3	0	1.9824	0.528	0.073	0	Blood vessel endothelium
FN1	0	1.96033	0.544	0.069	0	Blood vessel endothelium
GPM6A	0	1.94507	0.647	0.004	0	Blood vessel endothelium
CRIP2	0	1.93492	0.89	0.34	0	Blood vessel endothelium
ARL4A	0	1.92657	0.736	0.248	0	Blood vessel endothelium
HYAL2	0	1.92278	0.713	0.108	0	Blood vessel endothelium
APP	0	1.90331	0.936	0.538	0	Blood vessel endothelium
FLT4	0	1.9005	0.63	0.013	0	Blood vessel endothelium
TIMP3	0	1.89264	0.927	0.363	0	Blood vessel endothelium
TFF3	0	1.87158	0.727	0.264	0	Blood vessel endothelium
KLF2	0	1.8707	0.894	0.422	0	Blood vessel endothelium
ARHGAP29	0	1.85902	0.747	0.162	0	Blood vessel endothelium
TIE1	0	1.84425	0.707	0.006	0	Blood vessel endothelium
HLA-E	0	1.83197	0.979	0.786	0	Blood vessel endothelium
RAB11A	0	1.81637	0.844	0.402	0	Blood vessel endothelium
S100A10	0	1.81544	0.942	0.633	0	Blood vessel endothelium
CD59	0	1.76445	0.904	0.506	0	Blood vessel endothelium
TM4SF18	0	1.7559	0.583	0.002	0	Blood vessel endothelium
ADIRF	0	1.75	0.895	0.432	0	Blood vessel endothelium
EFEMP1	0	1.72993	0.69	0.336	0	Blood vessel endothelium
KANK3	0	1.72567	0.628	0.015	0	Blood vessel endothelium
SPTBN1	0	1.71861	0.891	0.443	0	Blood vessel endothelium
CLEC14A	0	1.70194	0.579	0.006	0	Blood vessel endothelium
RGS16	0	1.69976	0.508	0.136	0	Blood vessel endothelium
PKHD1L1	0	1.69898	0.541	0.062	0	Blood vessel endothelium
RCAN1	0	1.67993	0.413	0.063	0	Blood vessel endothelium
CD9	0	1.67552	0.87	0.422	0	Blood vessel endothelium
S1PR1	0	1.67378	0.67	0.032	0	Blood vessel endothelium
SMAD1	0	1.64977	0.654	0.118	0	Blood vessel endothelium
GJA1	0	1.64164	0.624	0.101	0	Blood vessel endothelium
MGST2	0	1.63211	0.781	0.217	0	Blood vessel endothelium
VIM	0	1.62155	0.993	0.839	0	Blood vessel endothelium
SHC1	0	1.58349	0.702	0.182	0	Blood vessel endothelium
STOM	0	1.58322	0.792	0.295	0	Blood vessel endothelium
FSCN1	0	1.57965	0.629	0.144	0	Blood vessel endothelium
CALCRL	0	1.57888	0.643	0.057	0	Blood vessel endothelium
TGFBR2	0	1.5708	0.719	0.199	0	Blood vessel endothelium
IGFBP7	0	1.56709	0.954	0.677	0	Blood vessel endothelium
TSPAN7	0	1.54628	0.603	0.019	0	Blood vessel endothelium
PDE2A	0	1.5376	0.595	0.022	0	Blood vessel endothelium
HES1	0	1.53375	0.573	0.211	0	Blood vessel endothelium
ROBO4	0	1.50423	0.602	0.003	0	Blood vessel endothelium
PHLDA1	0	1.49815	0.684	0.286	0	Blood vessel endothelium
CXorf36	0	1.48546	0.588	0.003	0	Blood vessel endothelium
CNN3	0	1.46477	0.856	0.439	0	Blood vessel endothelium
AKAP12	0	1.46458	0.738	0.358	0	Blood vessel endothelium
SEMA6A	0	1.46257	0.589	0.063	0	Blood vessel endothelium
RHOJ	0	1.46062	0.536	0.061	0	Blood vessel endothelium
ID1	1.01329e-154	1.44948	0.615	0.398	3.39839e-150	Blood vessel endothelium
NRN1	0	1.43722	0.624	0.003	0	Blood vessel endothelium
MT1X	3.79805e-180	1.42548	0.551	0.28	1.27379e-175	Blood vessel endothelium
CHRDL1	0	1.41776	0.52	0.077	0	Blood vessel endothelium
GIMAP1	0	1.41304	0.59	0.049	0	Blood vessel endothelium
KLF4	0	1.40822	0.916	0.537	0	Blood vessel endothelium
PGM5	0	1.40273	0.566	0.09	0	Blood vessel endothelium
TCF4	0	1.39057	0.784	0.334	0	Blood vessel endothelium
CAV2	0	1.3775	0.662	0.146	0	Blood vessel endothelium
GIMAP7	0	1.37576	0.601	0.07	0	Blood vessel endothelium
LOX	0	1.37186	0.453	0.038	0	Blood vessel endothelium
MTUS1	0	1.36959	0.627	0.188	0	Blood vessel endothelium
ARL6IP1	0	1.3661	0.861	0.597	0	Blood vessel endothelium
FAM84A	0	1.36531	0.477	0.022	0	Blood vessel endothelium
CDH5	0	1.36226	0.558	0.002	0	Blood vessel endothelium
HS3ST1	0	1.35244	0.523	0.078	0	Blood vessel endothelium
SNCG	0	1.34933	0.647	0.137	0	Blood vessel endothelium
CNKSR3	0	1.34467	0.506	0.05	0	Blood vessel endothelium
WARS	0	1.34024	0.675	0.171	0	Blood vessel endothelium
LAYN	0	1.34021	0.569	0.085	0	Blood vessel endothelium
EDNRB	0	1.32729	0.505	0.01	0	Blood vessel endothelium
ELK3	0	1.32233	0.63	0.102	0	Blood vessel endothelium
SLC9A3R2	0	1.317	0.568	0.138	0	Blood vessel endothelium
